# Supplementary material for: Single chromatin fiber profiling and nucleosome position mapping in the human brain
Source: PubMed Central journal article supplement — Cell Rep Methods. 2024 Dec 3;4(12):100911. doi: 10.1016/j.crmeth.2024.100911 (PMC11704683; doi:10.1016/j.crmeth.2024.100911), 2024-12-03

**Cell Reports Methods, Volume 4**

**Supplemental information**

**Single chromatin fiber profiling  
and nucleosome position mapping  
in the human brain**

**Cyril J. Peter, Aman Agarwal, Risa Watanabe, Bibi S. Kassim, Xuedi Wang, Tova Y. Lambert, Behnam Javidfar, Viviana Evans, Travis Dawson, Maya Fridrikh, Kiran Girdhar, Panos Roussos, Sathiji K. Nageshwaran, Nadejda M. Tsankova, Robert P. Sebra, Mitchell R. Vollger, Andrew B. Stergachis, Dan Hasson, and Schahram Akbarian**

**Supplementary figures S1-S9, legends and figures.**

**Supplemental Figure S1: Single nucleus transcriptomes confirm complete separation of neuronal and glial population after sorting with NeuN antibody** (related to Figure 1).

**(A, B)** Uniform Manifold Approximation and Projection (UMAP) plots generated after combined analysis of single nucleus-RNAseq of 22,844 NeuN+ and 13,977 NeuN- nuclei sorted from frontal cortex tissue block of a 24y/o male donor (Brain ID SN2a, Table S1), with median genes expressed/ nucleus NeuN+, 2,859 and NeuN-, 2,675 , respectively. Notice **(A)** complete separation of NeuN+ and NeuN- nuclei populations, with **(B)** NeuN+ comprised of excitatory (Exc) and inhibitory (Inh) neuronal population, and NeuN- comprised of oligodendrocytes (Ol) and oligodendrocyte precursors (OPC), astrocytes (Ast) and microglia (Mg), as indicated. **(C)** Single nucleus expression levels of RBFOX3 as the NeuN encoding transcript confirms overwhelming proportion of RBFOX3+ nuclei locating to excitatory and inhibitory neuronal subtype.

**A**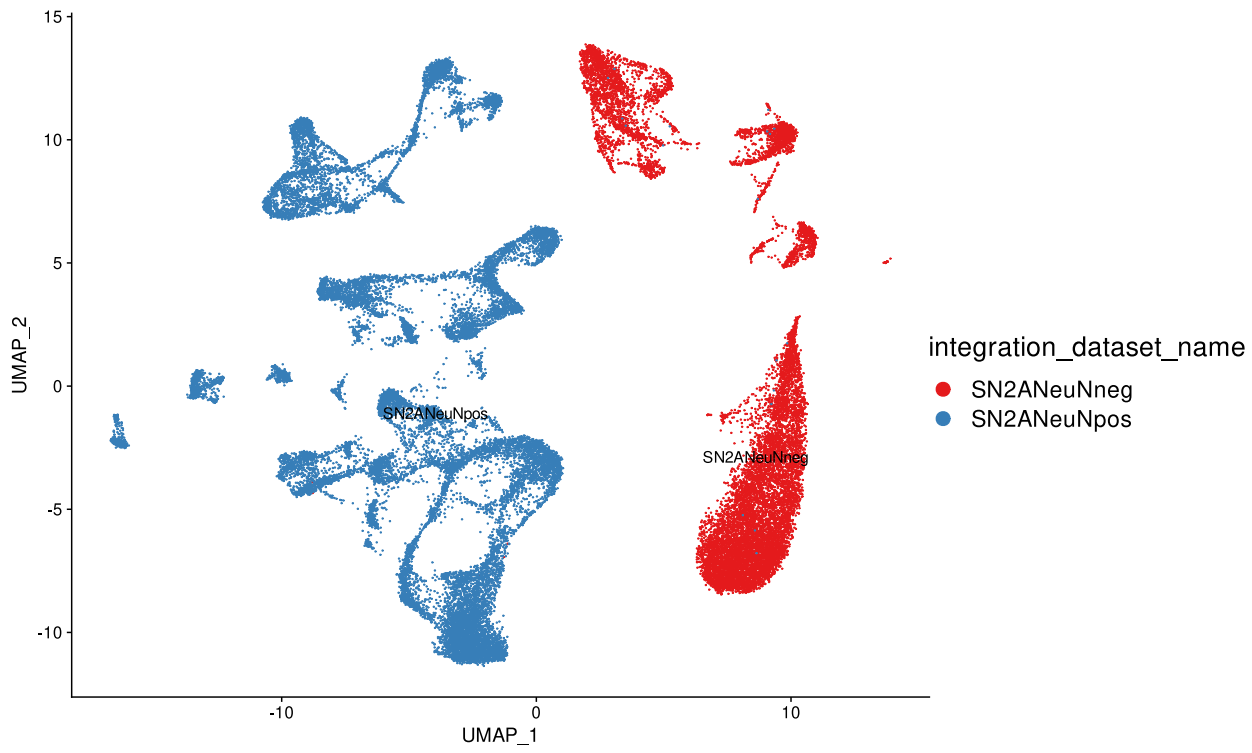**B**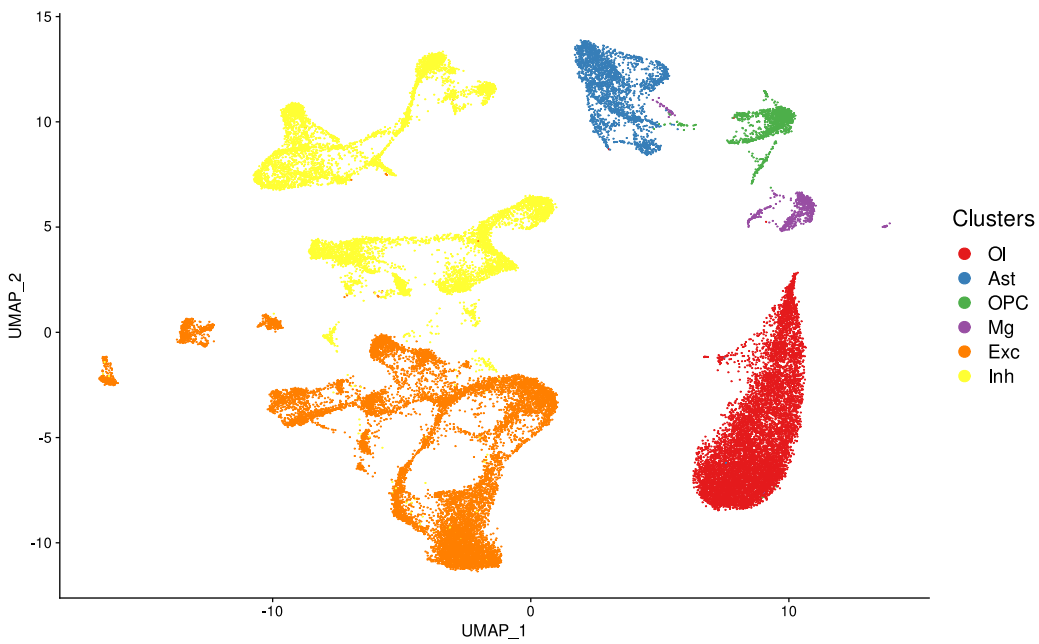**C**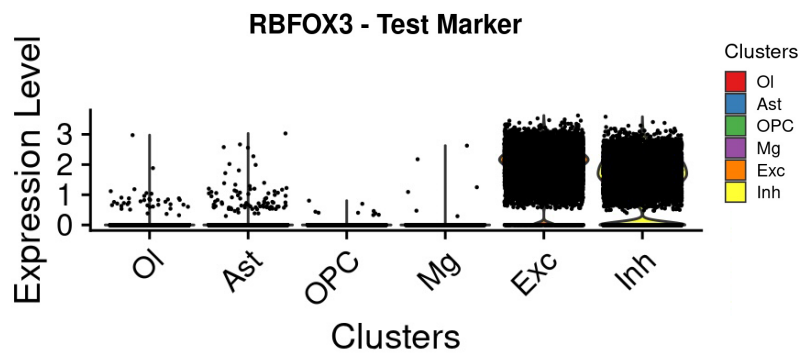

**Supplemental Figure S2: Production of the Hia5 Enzyme, ELISA Detection of m6A, and Quality Control Checks for the m6A Background Signal in Brain** (related to STAR Methods).

**(a)** Plasmid construction (top) and DNA sequence (bottom left) of the *Hemophilus influenzae* Hia5 m6A adenylmethyltransferase to be expressed in *E. coli*. (bottom right) SDS-PAGE gel of the recombinant produced Hia5 purified protein. **(b)** Synthetic 1026 bp DNA construct with adenine locations marked, as indicated. (bottom left) Polyacrylamide gel electrophoresis (PAGE). Unmethylated synthetic DNA (Ctrl) is not cleaved after treatment with the restriction enzyme DpnI. Synthetic DNA treated with in-house generated Hia5, and commercially acquired EcoGII enzyme shows expected cleavage product after DpnI digest. (bottom right) slot-blot incubated with anti-m6A antibody. Synthetic DNA substrate (top to bottom) untreated (no enzyme control), Hia5 treated, EcoGII treated. **(c)** (left) Graphical representation of ELISA assay to quantify activity of recombinant Hia5 produced in-house. Each step of the reaction is given its own box (green box, add material to the reaction; blue box depict wash steps where the substrate remains unchanged; red box shows the blocking step. Reagents marked in bold font; black font marks volume, blue incubation time, red temperature (RT: room temperature). (right) The line plot and well-plate show increasing ELISA fluorescence detected with increasing amounts of methyltransferase (blue, red dots), but no fluorescence when enzyme is not added (yellow, blue dots). **(d)** Graphical depiction of *in situ* Hia5 methyltransferase treatment of FACS sorted NeuN+ and NeuN- nuclei as indicated. **(e)** Slot blot-assay with anti-m6A antibody as quality control check for (test mouse M1 and M2) DNA from FACS-sorted brain nuclei after being processed as libraries for sequencing. **(f)** Histograms showing the per-read detected adenine methylation for Hia5 treated (red, left) and untreated (blue, right) human postmortem cerebral cortex. Treated samples showed a median proportion of adenines methylated at 0.03, while untreated samples had a mean of 0.





**Supplemental Figure S3: Impact of postmortem interval, nuclei to Hia5 ratio and CCS on methyl-adenine labeling. Impact of genome-level adenine methylation on Fiber-seq computational outcomes** (related to Figure 1 and STAR Methods).

**(A)** Correlation plots to assess impact of postmortem interval (PMI), circular consensus sequence (CCS), N nuclei / Hia5 unit on methyl-adenine m6A/A proportion, for 41 PFC Fiber-seq assays. Data are shown after log-transformation and square root-transformation of  $N$  nuclei per Hia5 Unit and of m6A proportions, respectively. Lower panels, diagonal panels, and the upper panels show scatter plot, histogram, and Pearson's correlation coefficient with p-values, respectively. See also results of linear mixed model effects, **Table S2A**. **(B)** Data distribution and the correlation of m6A and MTase-sensitive patches (MSP) and computational nucleosome sizes. **(C)** Data distribution and the correlation of m6A, sequenced reads, and Fiber-seq Inferred Regulatory Elements (FIREs). To ensure normality, m6A and FIRE were transformed using the square-root function, and the number of reads were transformed using log. For the samples that failed to call FIRE, a value 0.00001 was given before the transformation. Lower panels, diagonal panels, and the upper panels show scatter plot, histogram, and Pearson's correlation with p-values, respectively. The m6A, the proportion of methylated adenines. MSP, the average size (bp) of MTase-sensitive patches. MONO, average mono-nucleosome size (bp). DI, average di-nucleosome size (bp). FIRE, the number of Fiber-seq Inferred Regulatory Elements that were called. Reads, the number of sequenced reads. See also **Table S2B**.

A.

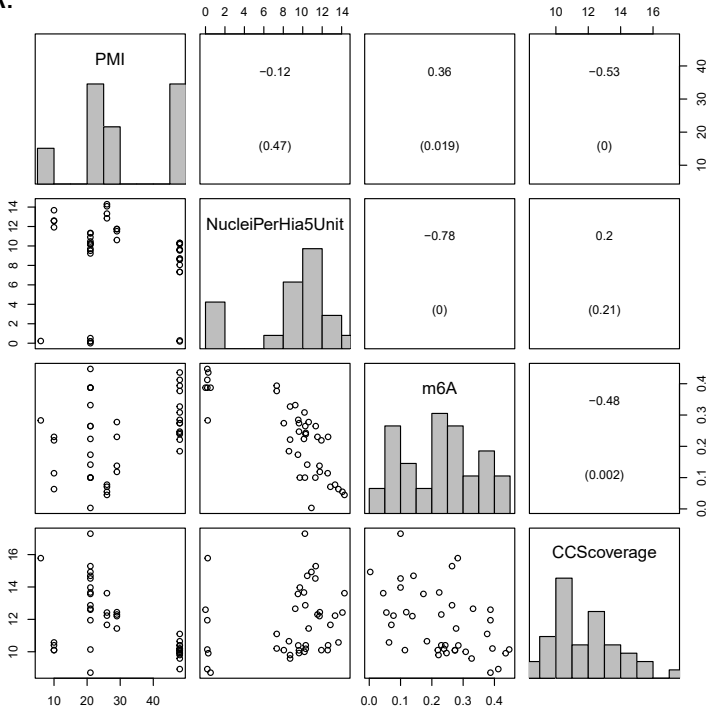

B.

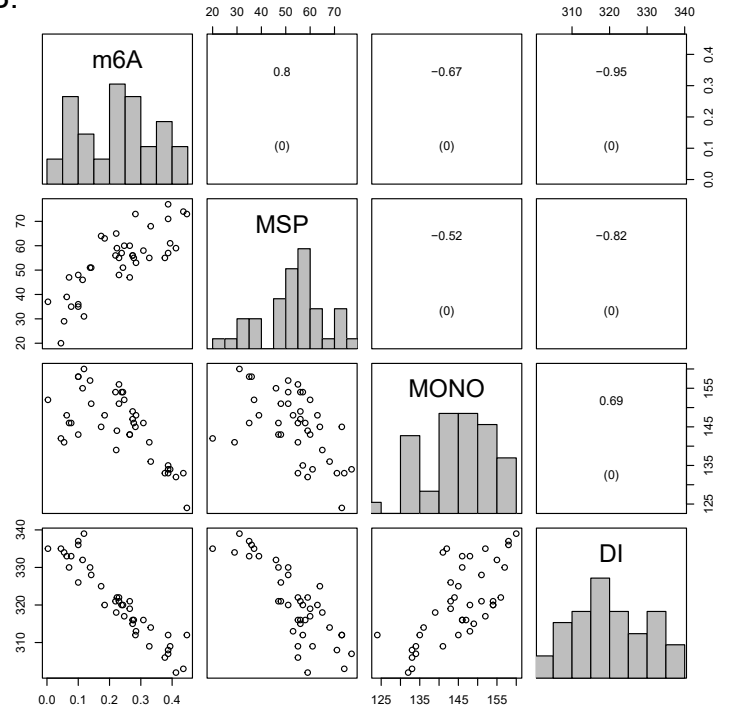

C.

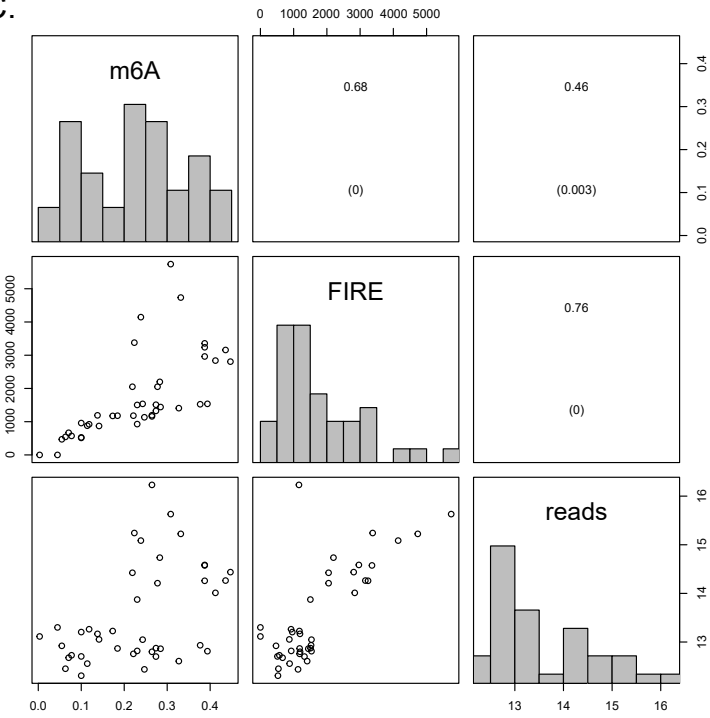

**Supplemental Figure S4: Cell-type Specific Fiber-seq Data Processing and Correlation with ATAC-seq** (related to Figure 2).

**(a)** Graphic depicting the standard Fiber-seq data processing workflow for PacBio Sequel II sequenced BAM files. See methods for more details on processing BAM files after sequencing. **(b)** Histogram showing the distribution of sizes of predicted nucleosomes in two deeply sequenced NeuN+ (red) and NeuN- (blue) Fiber-seq reference libraries. Median mono-nucleosome length is 150bp for NeuN+ and 142bp for NeuN-; median di-nucleosome or larger length is 320bp for both NeuN+ and NeuN-. **(c-f)** Profile plots showing the average signal enrichment for ATAC-seq, H3K4me3 and H3K27ac ChIP-seq, and Fiber-seq, from left to right for ATAC-seq peaks clusters 1 (c), 2 (d), 3 (e), and 4 (f). **(g-h)** Correlation scatter plots comparing log<sub>2</sub> total Fiber-seq pseudobulk accessibility signal versus log<sub>2</sub> total ATAC-seq signal within NeuN+ (g) and NeuN- (h) ATAC-seq peaks. (left) Promoter (right) enhancer peaks.

**a.**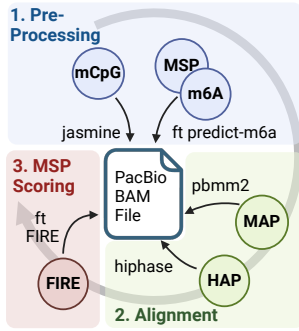**b.**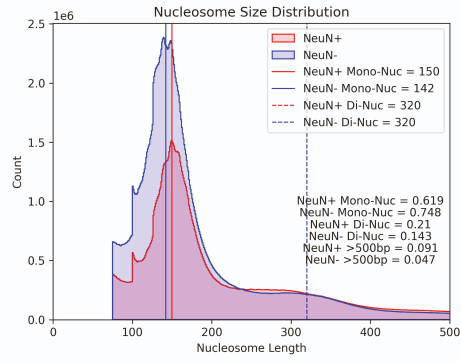**g.**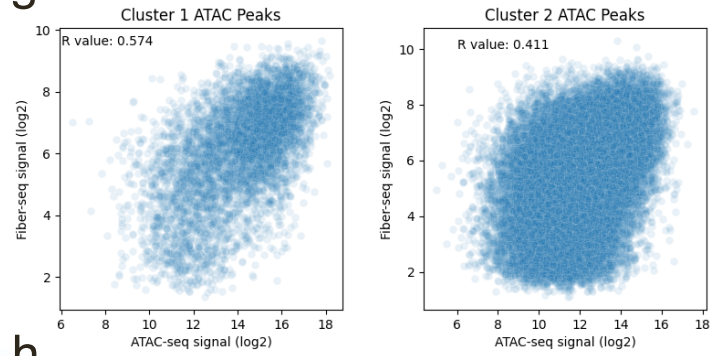**h.**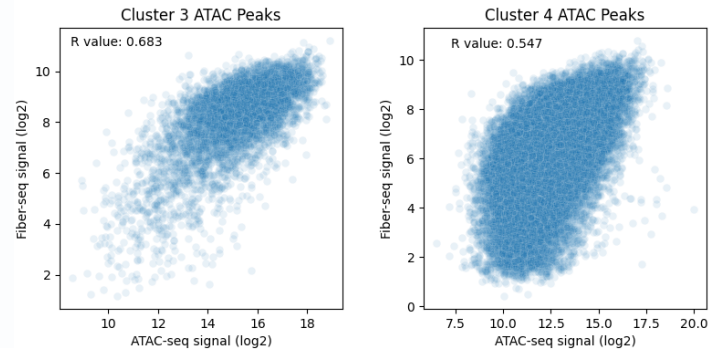**c.**

Cluster 1

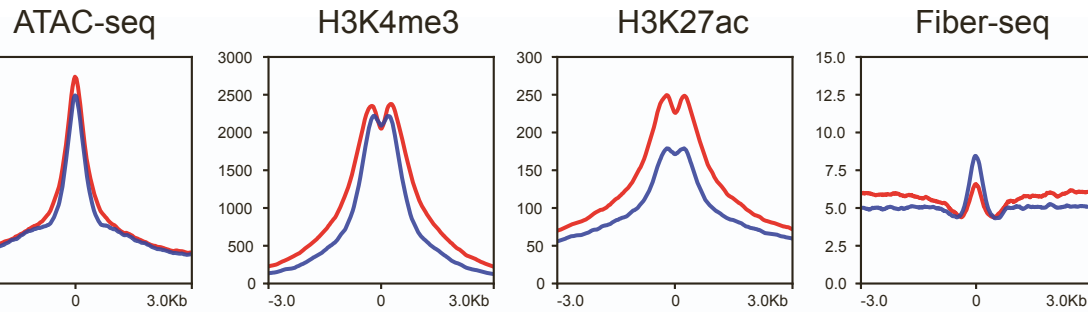**d.**

Cluster 2

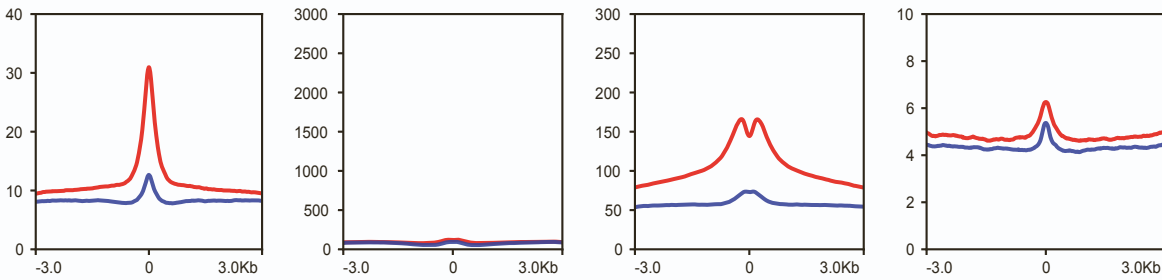**e.**

Cluster 3

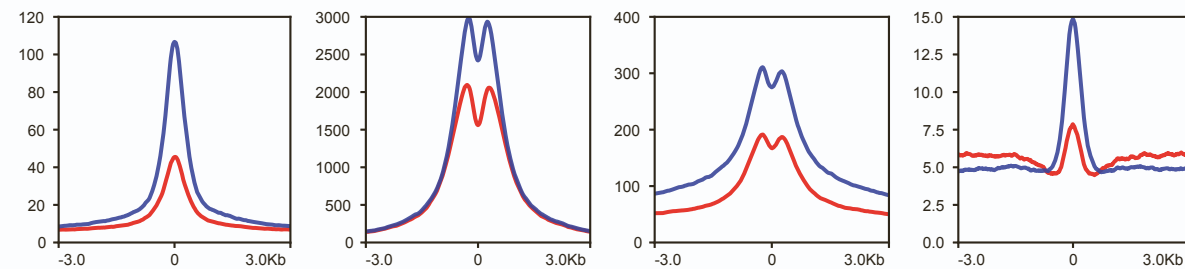**f.**

Cluster 4

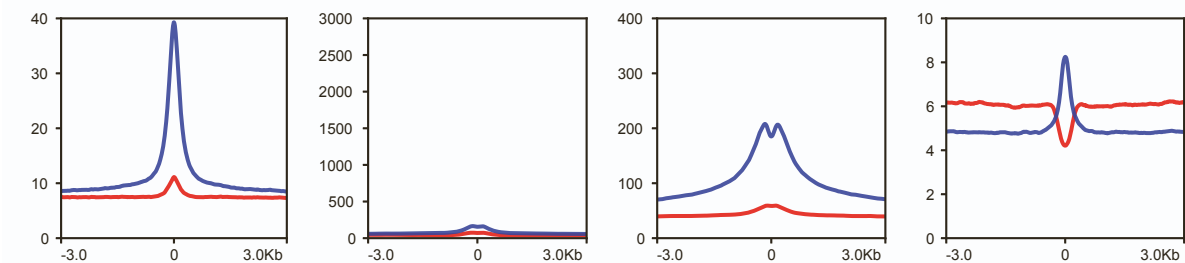

**Supplementary Figure S5: NeuN+ versus NeuN- Fiber-seq peak differentials are tracking corresponding cell type specific difference in ATAC-seq dataset** (related to Figure 2).

a. (NeuN+ enhancers) This is a scatter plot that shows the average difference in fiber-seq percent accessibility vs the average difference ATAC-seq counts at each position  $\pm 3\text{kb}$  of the ATAC-seq peak center from cluster 2 in main **Figure 2E**. NeuN+ enhancers shown in purple. The line of best fit (black) is calculated using a linear regression and has an R-squared value of 0.85 with a p-value of 0.

b. (NeuN- enhancers) This is a scatter plot that shows the average difference in fiber-seq percent accessibility vs the average difference ATAC-seq counts at each position  $\pm 3\text{kb}$  of the ATAC-seq peak center from cluster 4 in in main **Figure 2F**. The NeuN- enhancers are shown in purple. The line of best fit (black) is calculated using a linear regression and has an R-squared value of 0.98 with a p-value of 0.

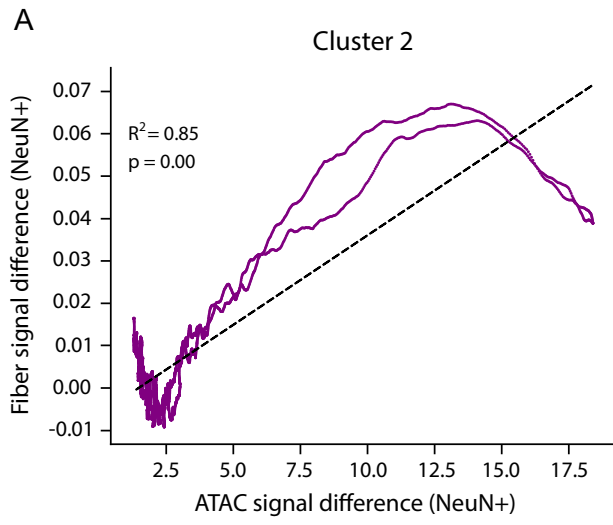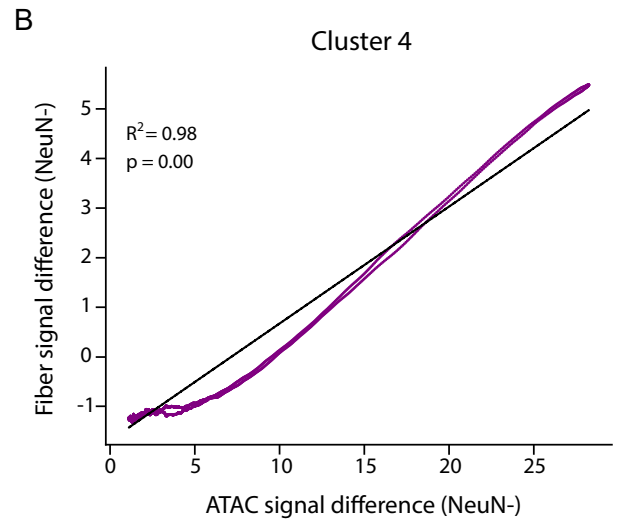

**Supplemental Figure S6: Fiber-seq Peak Detection Limits** (related to Figure 3).

(a-b) Line plot showing the number of peaks called in Fiber-seq data with an FDR < 0.05 as a function of the proportion of accessible single fibers at the peak for our (a) NeuN- and (b) NeuN+ reference sets. Barplot at the top shows the cumulative peak count as a function of the percent accessibility, broken into 5% bins. (c) Heatmap showing the ATAC-seq signal at cluster 4 FIRE peaks in NeuN+ (left) and NeuN- (right). Scale has been adjusted to show signal at background levels. (d) Fiber-seq cluster-specific proportional representation for repeat- and non-repeat sequences (clusters 1-4 in Figure 3A). (e) Regulatory CTCF motif footprints with Fiber cluster-specific binding scores as indicated (\*\*\*,  $P < 1e-16$ , Kruskal-Wallis), note binding sites sharply marked at NDR center. (f) Plots depicting the average proportion of adenines that are methylated in fibers centered at CTCF motif that are not in an MSP with no footprint (n=18,997 fibers). Notice minimal nucleosomal positioning effects, in sharp contrast to fibers with MSP over the CTCF motif (see main **Figure 3G**).



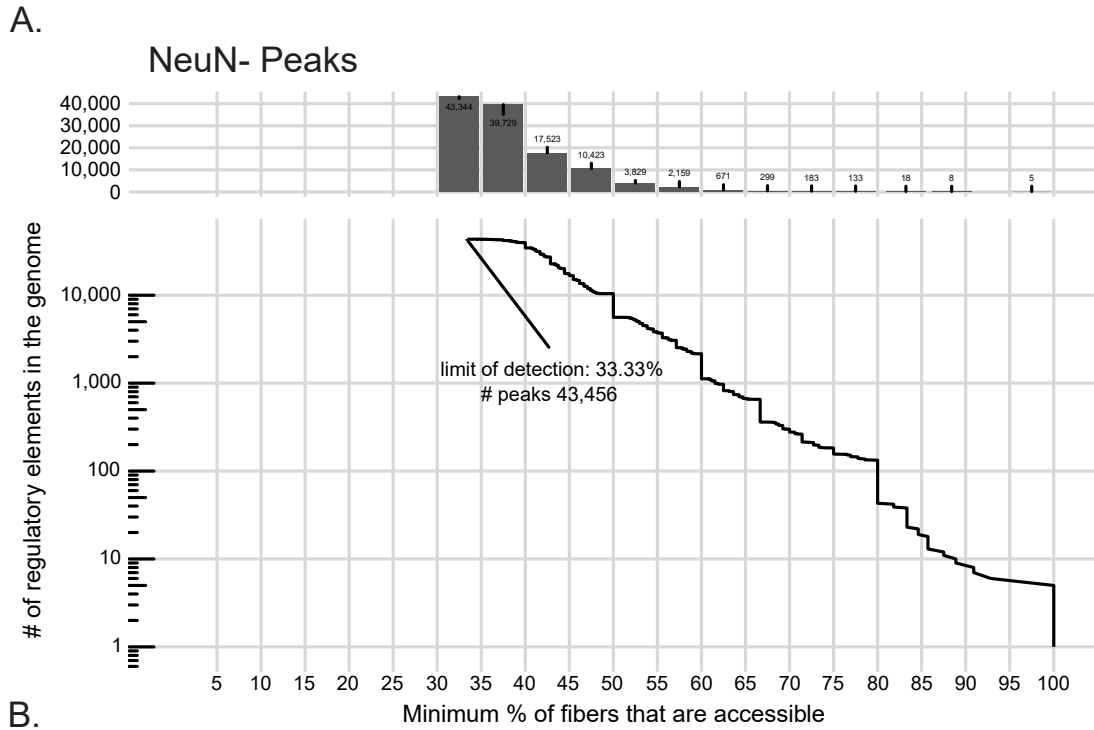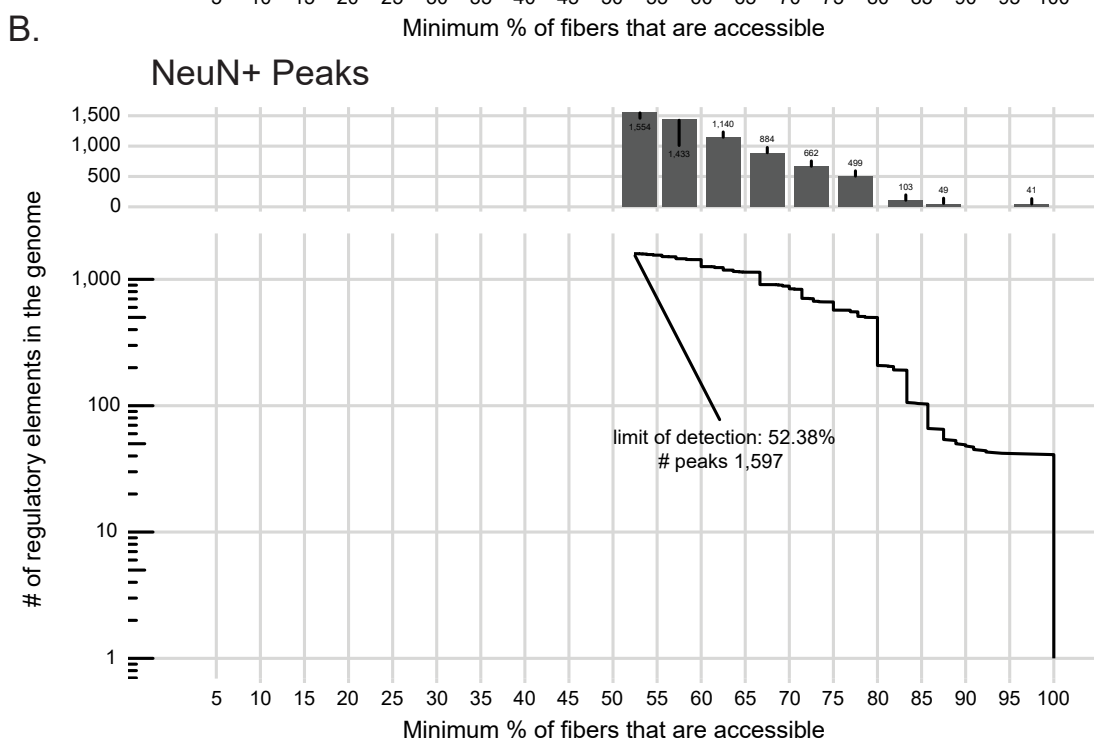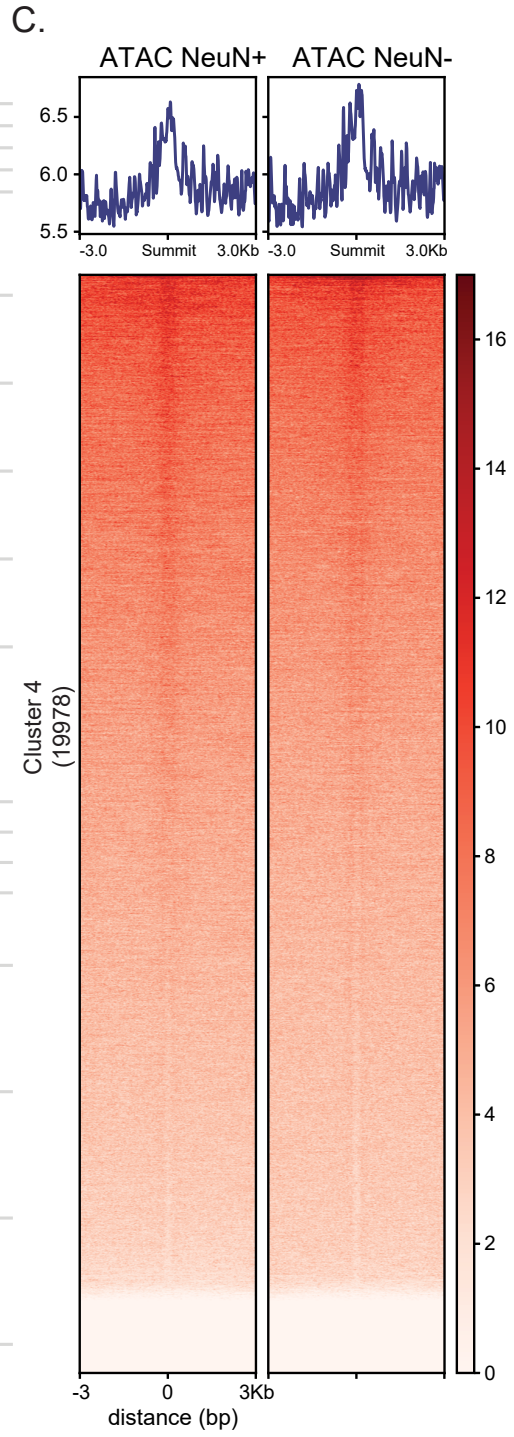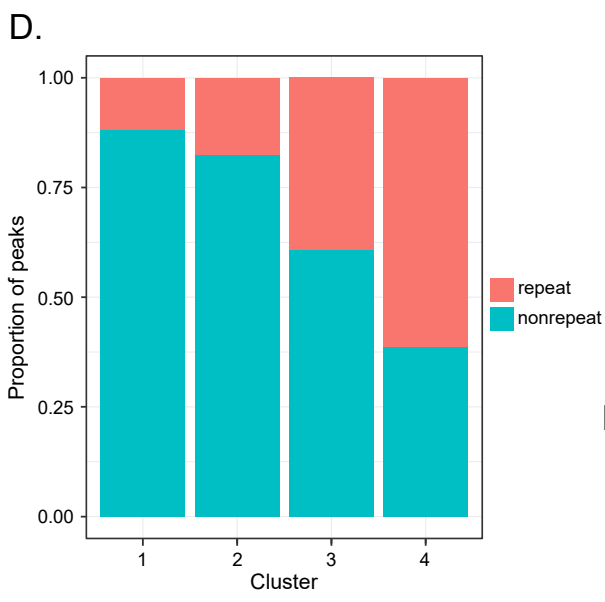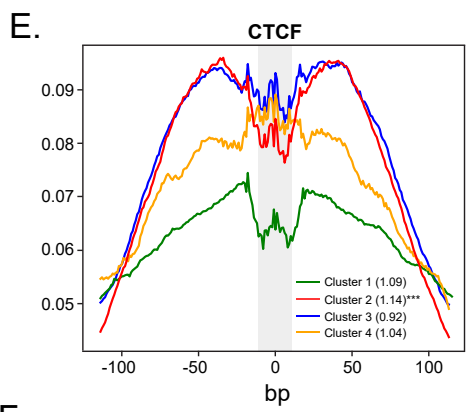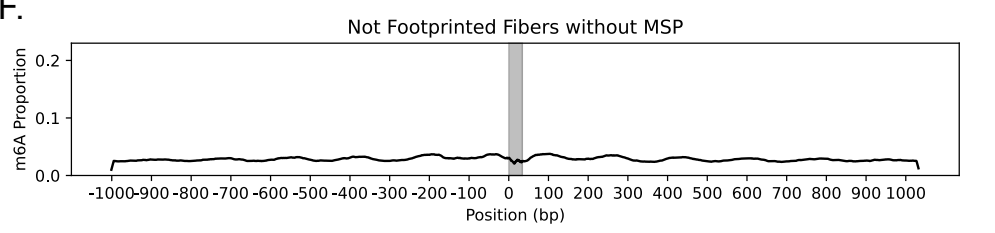

**Figure S7: Fiber-specific resolution of a CTCF footprint at a single locus** (related to Figure 3).

This visualization shows the single fibers (n=31) that overlap a CTCF motif site found within a cluster 2 Fiber-seq peak, located at chr1:110064114-11006448, and centered at the start of the motif. Each row indicates a fiber that overlaps the locus, with the fibers numbered on the left vertical axis, and the genomic position relative to the motif start on the lower horizontal axis. On each fiber, the positions of m6A (dark purple) and mCpG (brown) are indicated with vertical lines. The fiber is divided into nucleosome (gray) and MSP (light purple) patches. The motif region, indicated by dotted lines, where each division represents a binding domain in the motif, is denoted as footprinted (green) or not footprinted (yellow), based on the presence of m6A marks in the motif region in that fiber.

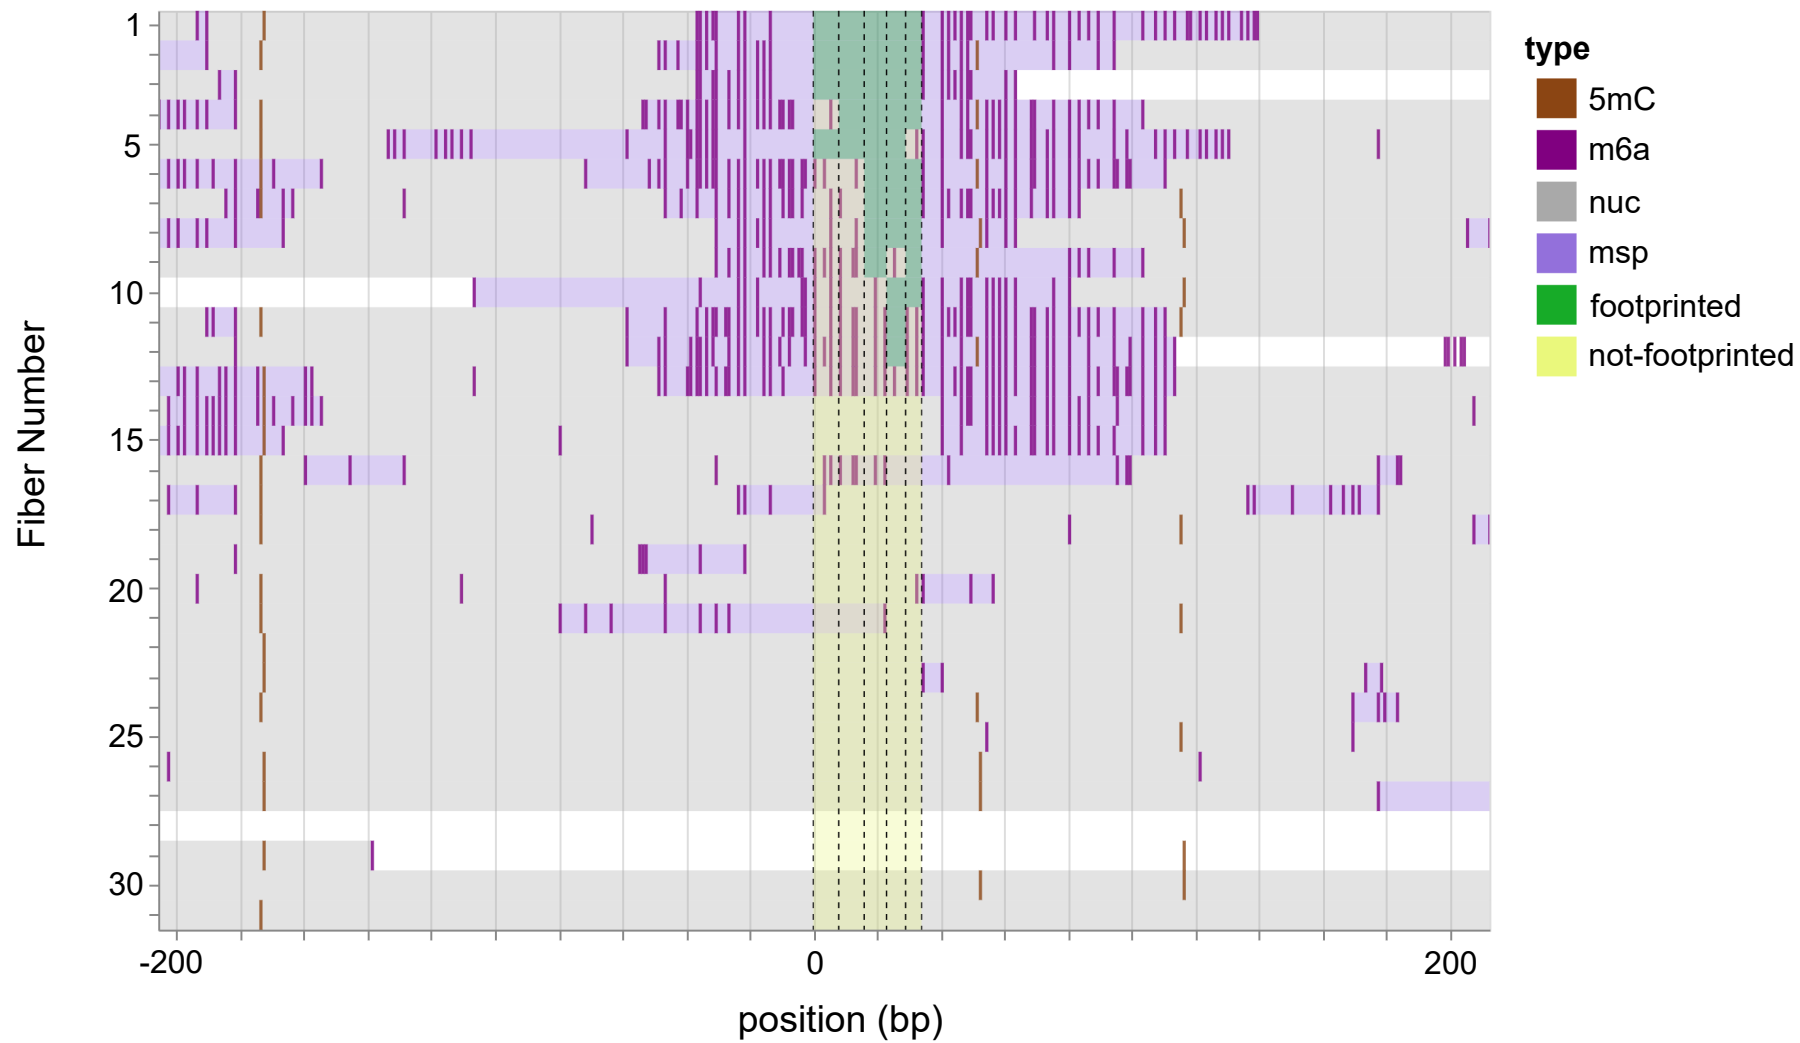

**Supplemental Figure S8: Transcription factor footprinting and nucleosome positioning at transcription start sites** (related to Figure 4).

**(A)** This series of box plots depicts the average nucleosome offset centered at the TSS for genes that have a FIRE peak overlapping their promoter (n=119) and have at least 20 fibers and 6 fibers per category. Only fibers that have an MSP overlapping the TSS were used. The -1 and +1 nucleosomes have a significantly different offset when compared to all other nucleosomes with p-values of  $1.34 \times 10^{-6}$  and  $2.79 \times 10^{-4}$  respectively. The -2 nucleosome shows significance before multiple-test correction ( $p=0.038$ ) but does not pass the threshold post correction. **(B)** This series of box plots depicts the average nucleosome offset centered at the TSS for genes that have a FIRE peak overlapping their promoter. Only fibers that have do not have an MSP overlapping the TSS were used. The -1 and +1 nucleosomes do not have a significant different offset when compared to all other nucleosomes. **(C,D)** These plots depict the average proportion of adenines that are methylated (m6a prop) in fibers overlapping the TSS of genes that have a FIRE peak in their promoter, either **(C)** centered at the TSS or **(D)** centered at the FIRE peak. The fibers are split into those with an MSP overlapping the TSS (purple) and those without one (gray), and the average m6a prop at each position 1kb upstream and downstream is calculated for each class of fibers. The x-axis shows the position in base pairs, and the y-axis shows the average proportion of methylated adenines.

**A**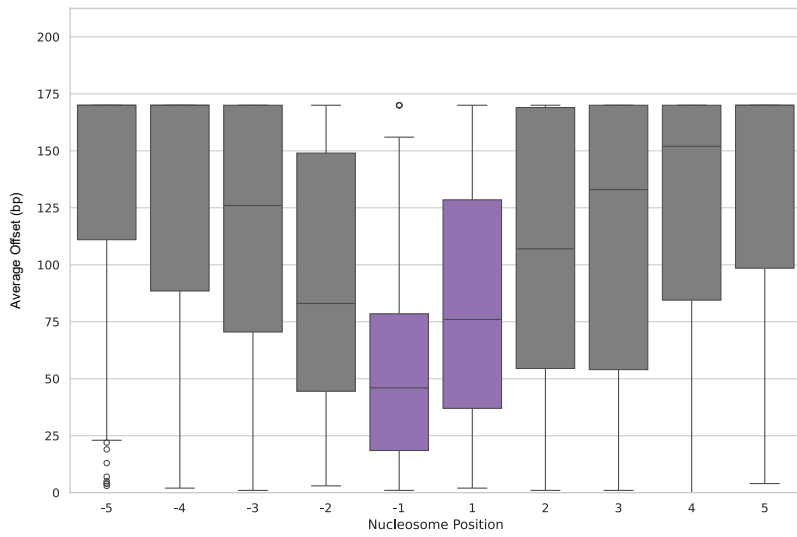**B**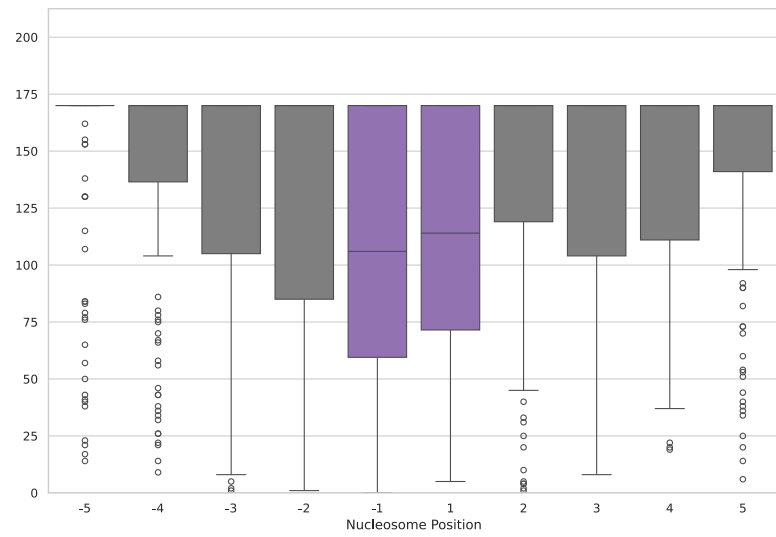**C**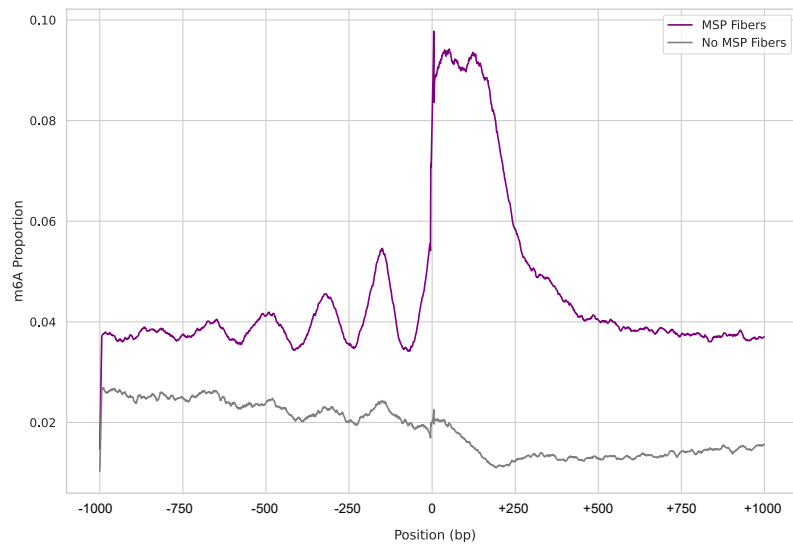**D**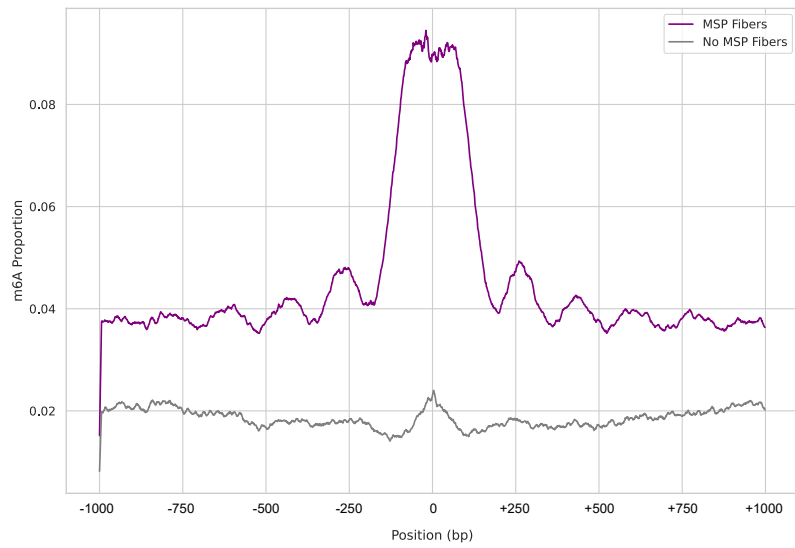

**Supplemental Figure 9: Nucleosome sliding in single fibers and observed versus expected proportion of co-actuated peaks** (related to Figure 4).

(a) Histogram showing the average single-fiber nucleosome encroachment into promoter FIRE peaks (blue) versus randomly selected internucleosomal linker regions (red) ( $P < 1e-17$ , Kruskal-Wallis Test). (b) Paired swarm plot showing the average single-fiber nucleosome encroachment for open (red) versus closed (blue) fibers at promoter FIRE peaks ( $P < 1e-12$ , Kruskal Wallis Test). (c,d) Plots shows the actual proportion of co-actuated fibers (green) compared to that peak's expected co-actuation proportion (orange) for (c) significantly co-actuated peaks ( $p < 0.05$ , Fisher Test) and (d) for non-significant co-actuated peaks ( $p \geq 0.05$ , Fisher Test). The x-axis denotes the two metrics that are computed for each peak and the y-axis depicts the proportion. The slope of the blue line indicates the average difference in the actual vs expected proportion for these peaks (c,  $m=0.149$ ; d,  $m=0.036$ ). P-value shown at figure bottom ( $P= 1.64 \times 10^{-227}$ ) indicates significance of one-tailed t-test between the average differences of significant and non-significant peaks.

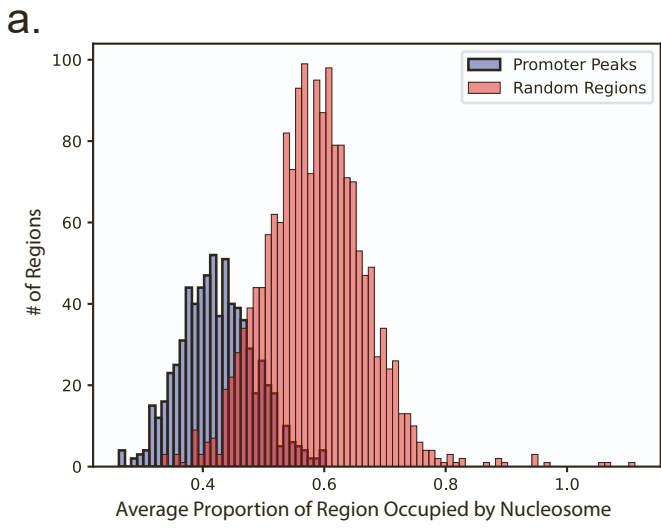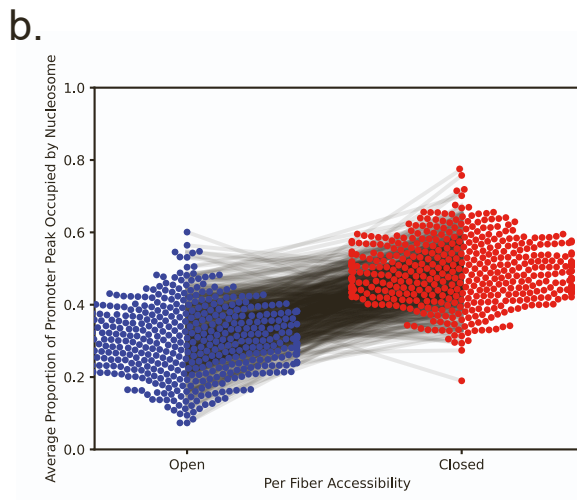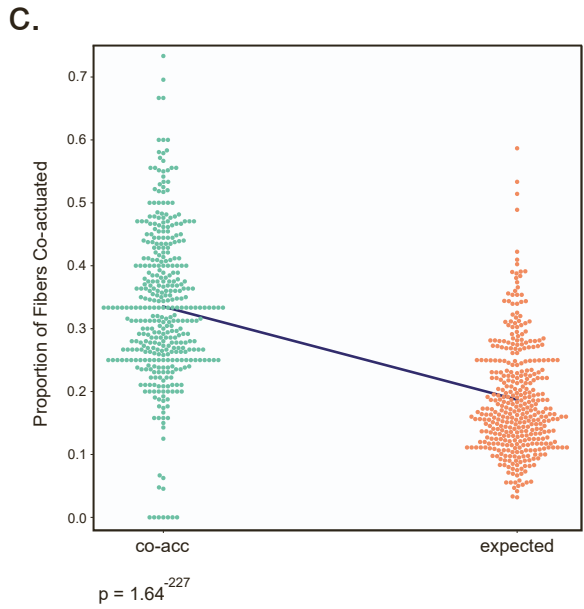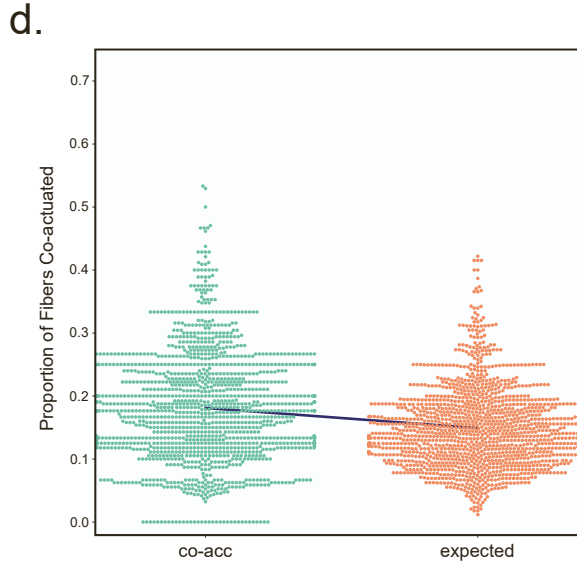

Supplement: mmc1.pdf [file mmc1.pdf]
